# Supplementary material for: Evaluation of interventions to improve electronic health record documentation within the inpatient setting: a protocol for a systematic review
Source: PubMed Central journal article supplement (PMC6373133; doi:10.1186/s13643-019-0971-2), 2019-02-13
Supplement: 13643_2019_971_MOESM2_ESM.pdf [file 13643_2019_971_MOESM2_ESM.pdf]

## Additional file 2. REDCap data extraction form

Reviewer Initials

---

Study ID

---

Author

---

(Last name of author)

Year

---

(Year of publication)

### Study Characteristics

What continent was the study conducted in?

- North America
- South America
- Europe
- Asia
- Africa
- Australia/Oceania

What country was the study conducted in?

- Canada
- U.S.A.
- Mexico
- Germany
- France
- Italy
- Japan
- China
- North/South Korea
- Australia
- New Zealand
- Brazil
- Russia
- Other

Please specify the country.

---

What type of hospital setting was the study conducted in? Select all that apply.

- Community hospital
- Teaching hospital
- Academic hospital
- General hospital
- Specialty care hospital
- Urban hospital setting
- Rural hospital setting
- Single centre
- Multi centre

What specialty area was the study conducted in? Select all that apply.

- Trauma
- Intensive Care
- Renal
- Cardiac
- Neurological
- Orthopaedic
- Hematological
- Paediatric
- Other
- All of the above

Who was the intervention applied on? (In other words, who were the study participants?) Select all that apply.

- Nurses
- Physicians
- Pharmacists
- Occupational Therapists
- Radiologists
- Technicians
- Respiratory Therapists
- Students
- None of the above

How many study participants were there?

\_\_\_\_\_  
(Enter '0' if not provided. Enter '.' if not applicable. )

What was the female proportion of participants?

\_\_\_\_\_  
(%)

How many records were used?

\_\_\_\_\_  
(Enter '0' if not provided. Enter '.' if not applicable.)

What intervention was implemented to improve EHR documentation? Select all that apply.

- New EHR reporting system (e.g. structured, point-and-click, stroke-specific, proforma)
- New EHR software or vendor
- New EHR modality (e.g. hand-held computer, laptop)
- Reminders within EHR system
- Template/Guideline/Example displayed to EHR user
- Educational program (e.g. training session, in-service, video, simulation)
- Feedback provided to EHR user
- Audit
- Other

Please describe the intervention used.

\_\_\_\_\_

What was the study design?

- RCT
- Observational
- Quasi-Experimental

Please specify. Select all that apply.

- Prospective
- Retrospective
- Pre-test/Post-test
- Interrupted time-series
- Combination
- Other
- Not specified

What was the intervention compared to?

- Standardized documentation
- Dictation
- Non-structured reporting
- No template provided
- Paper documentation
- No education provided
- Baseline (no further description)

What was the intervention compared to? Select all that apply.

- Standardized documentation
- Dictation
- Non-structured reporting
- No template provided
- No education provided
- Paper documentation
- Baseline (no further description)

Please select the type of observational study. Select all that apply.

- Prospective cohort
- Retrospective cohort
- Prospective case-control
- Retrospective case-control
- Cross-sectional
- Unsure

What were the control and intervention arms?

Was randomization used?

- 
- No
  - Yes
  - Not specified
  - Unsure

Was there assessment for bias?

- No
- Yes
- Not specified
- Unsure

Was blinding used?

- No
- Yes
- Not specified
- Unsure

Was allocation concealment used?

- No
- Yes
- Not specified
- Unsure

Was EHR documentation improved?

- No, it worsened
- Yes
- Yes and No
- No, it stayed the same

How was the intervention measured? Select all that apply.

- Medication accuracy (e.g. med. errors/reconciliation)
- Timeliness (e.g. time to complete documentation, time to availability of documentation)
- Completeness (missing information in document)
- Capture of documentation (more or less reports)
- Documentation accuracy (e.g. errors, discrepancies)
- Quality (e.g. quality indicators, overall quality)
- Clarity (as judged by reviewer of document)
- Length
- Other

Please describe the intervention measure.

Was documentation improved according to medication accuracy?

- 
- No, it was worse than control group
  - No, it stayed the same
  - Yes, it improved
  - Unsure

Was documentation improved according to timeliness?

- No, it was worse than control group
- No, it stayed the same
- Yes, it improved
- Unsure

Was documentation improved according to completeness?

- No, it was worse than control group
- No, it stayed the same
- Yes, it improved
- Unsure

Was documentation improved according to capture of documentation?

- No, it was worse than control group
- No, it stayed the same
- Yes, it improved
- Unsure

|                                                                         |                                                                                                                                                                                     |
|-------------------------------------------------------------------------|-------------------------------------------------------------------------------------------------------------------------------------------------------------------------------------|
| Was documentation improved according to documentation accuracy?         | <input type="radio"/> No, it was worse than control group<br><input type="radio"/> No, it stayed the same<br><input type="radio"/> Yes, it improved<br><input type="radio"/> Unsure |
| Was documentation improved according to quality?                        | <input type="radio"/> No, it was worse than control group<br><input type="radio"/> No, it stayed the same<br><input type="radio"/> Yes, it improved<br><input type="radio"/> Unsure |
| Was documentation improved according to clarity?                        | <input type="radio"/> No, it was worse than control group<br><input type="radio"/> No, it stayed the same<br><input type="radio"/> Yes, it improved<br><input type="radio"/> Unsure |
| Was documentation improved according to length?                         | <input type="radio"/> No, it was worse than control group<br><input type="radio"/> No, it stayed the same<br><input type="radio"/> Yes, it improved<br><input type="radio"/> Unsure |
| Was documentation improved according to this other measure?             | <input type="radio"/> No, it was worse than control group<br><input type="radio"/> No, it stayed the same<br><input type="radio"/> Yes, it improved<br><input type="radio"/> Unsure |
| What quantity of improvement was reported for medication accuracy?      | _____ (Specify if mean, rate, improved, worsened, etc.)                                                                                                                             |
| What quantity of improvement was reported for timeliness?               | _____ (Specify if mean, rate, improved, worsened, etc.)                                                                                                                             |
| What quantity of improvement was reported for completeness?             | _____ (Specify if mean, rate, improved, worsened, etc.)                                                                                                                             |
| What quantity of improvement was reported for capture of documentation? | _____ (Specify if mean, rate, improved, worsened, etc.)                                                                                                                             |
| What quantity of improvement was reported for documentation accuracy?   | _____ (Specify if mean, rate, improved, worsened, etc.)                                                                                                                             |
| What quantity of improvement was reported for quality?                  | _____ (Specify if mean, rate, improved, worsened, etc.)                                                                                                                             |
| What quantity of improvement was reported for clarity?                  | _____ (Specify if mean, rate, improved, worsened, etc.)                                                                                                                             |
| What quantity of improvement was reported for length?                   | _____ (Specify if mean, rate, improved, worsened, etc.)                                                                                                                             |
| Please provide a p-value for medication accuracy, if available.         | _____                                                                                                                                                                               |
| Please provide a p-value for timeliness, if available.                  | _____                                                                                                                                                                               |
| Please provide a p-value for completeness, if available.                | _____                                                                                                                                                                               |
| Please provide a p-value for capture of documentation, if available.    | _____                                                                                                                                                                               |
| Please provide a p-value for accuracy, if available.                    | _____                                                                                                                                                                               |
| Please provide a p-value for quality, if available.                     | _____                                                                                                                                                                               |

Please provide a p-value for clarity, if available.

\_\_\_\_\_

Please provide a p-value for length, if available.

\_\_\_\_\_

Please provide a p-value for this other measure, if available.

\_\_\_\_\_

Was there a difference in EHR documentation between study participants?

- No
- Yes

What factor influenced the difference in documentation between study participants? Select all that apply.

- EHR documentation setting
- Student versus non-student
- Years of experience
- Age
- Gender

Were study participants followed-up?

- No
- Yes
- Unsure

For how long?

\_\_\_\_\_  
(Please specify unit (days, weeks, months, years).)
