# Supplementary material for: Evaluation of interventions to improve electronic health record documentation within the inpatient setting: a protocol for a systematic review
Source: Syst Rev. 2019 Feb 13;8:54. doi: 10.1186/s13643-019-0971-2 (PMC6373133; doi:10.1186/s13643-019-0971-2)
Supplement: Supplementary file 3 — Study quality assessment tool adapted from Downs and Black Scale combined with Newcastle-Ottawa Scale (NOS). Eleven-item hybrid of Downs and Black and Newcastle-Ottawa Scales, used to assess study quality and systematic error (bias) of selected studies, encompassing experimental, quasi-experimental, and observational study designs. (PDF 644 kb) [file 13643_2019_971_MOESM3_ESM.pdf]

**Additional file 3.** Study quality assessment tool adapted from Downs and Black combined with Newcastle-Ottawa Scale (NOS).

|                                                                                                                                         | Yes | No | Unable to determine |
|-----------------------------------------------------------------------------------------------------------------------------------------|-----|----|---------------------|
| <b><i>Reporting</i></b>                                                                                                                 |     |    |                     |
| 1. Was the research question or objective in this paper clearly stated?                                                                 |     |    |                     |
| 2. Was the study population clearly specified and defined?                                                                              |     |    |                     |
| 3. Are the interventions of interest clearly described?                                                                                 |     |    |                     |
| 4. Are the main findings of the study clearly described?                                                                                |     |    |                     |
| 5. Have the negative and positive effects been reported?                                                                                |     |    |                     |
| <b><i>External validity</i></b>                                                                                                         |     |    |                     |
| 6. Were the subjects asked to participate in the study representative of the entire population from which they were recruited?          |     |    |                     |
| 7. Were the places and facilities where the interventions were implemented representative of the setting for the majority of EHR usage? |     |    |                     |
| <b><i>Internal validity – bias</i></b>                                                                                                  |     |    |                     |
| 8. Were the outcome measures clearly defined, valid, reliable, and implemented consistently across all study participants?              |     |    |                     |
| 9. Were the statistical tests used to assess the main outcomes appropriate?                                                             |     |    |                     |
| <b><i>Internal validity – confounding (selection bias)</i></b>                                                                          |     |    |                     |
| 10. Were the participants in different intervention groups recruited from the same population?                                          |     |    |                     |
| 11. Were inclusion and exclusion criteria for being in the study pre-specified and applied uniformly to all participants?               |     |    |                     |
